# Supplementary material for: Molecular mechanisms of tannin accumulation in Rhus galls and genes involved in plant-insect interactions
Source: PubMed Central journal article supplement (PMC6026138; doi:10.1038/s41598-018-28153-y), 2018-06-29
Supplement: 41598_2018_28153_MOESM1_ESM.pdf [file 41598_2018_28153_MOESM1_ESM.pdf]

## Supplementary Information

### **Molecular mechanisms of tannin accumulation in Rhus galls and genes involved in plant-insect interactions**

Hang Chen<sup>1,2\*</sup>, Juan Liu<sup>1</sup>, Kai Cui<sup>1</sup>, Qin Lu<sup>1</sup>, Chao Wang<sup>1,3</sup>, Haixia Wu<sup>1</sup>, Zixiang Yang<sup>1</sup>, Weifeng Ding<sup>1</sup>, Shuxia Shao<sup>1</sup>, Haiying Wang<sup>1</sup>, Xiaofei Ling<sup>1</sup>, Kirst King-Jones<sup>4</sup>, Xiaoming Chen<sup>1,2\*</sup>

<sup>1</sup> Research Institute of Resource Insects, Chinese Academy of Forestry, Kunming, China.

<sup>2</sup> The Key Laboratory of Cultivating and Utilization of Resources Insects, State Forestry Administration, Kunming, China.

<sup>3</sup> Southwest Forestry University, Kunming, China.

<sup>4</sup> Department of Biological Sciences, Biological Sciences Building, University of Alberta, Edmonton, Canada.

\*Corresponding author: Xiaoming Chen and Hang Chen, Research Institute of Resource Insects, Chinese Academy of Forestry, Kunming, China.

Telephone: +86 0871 63860019

E-mail: Cafcxm@139.com, stuchen6481@gmail.com

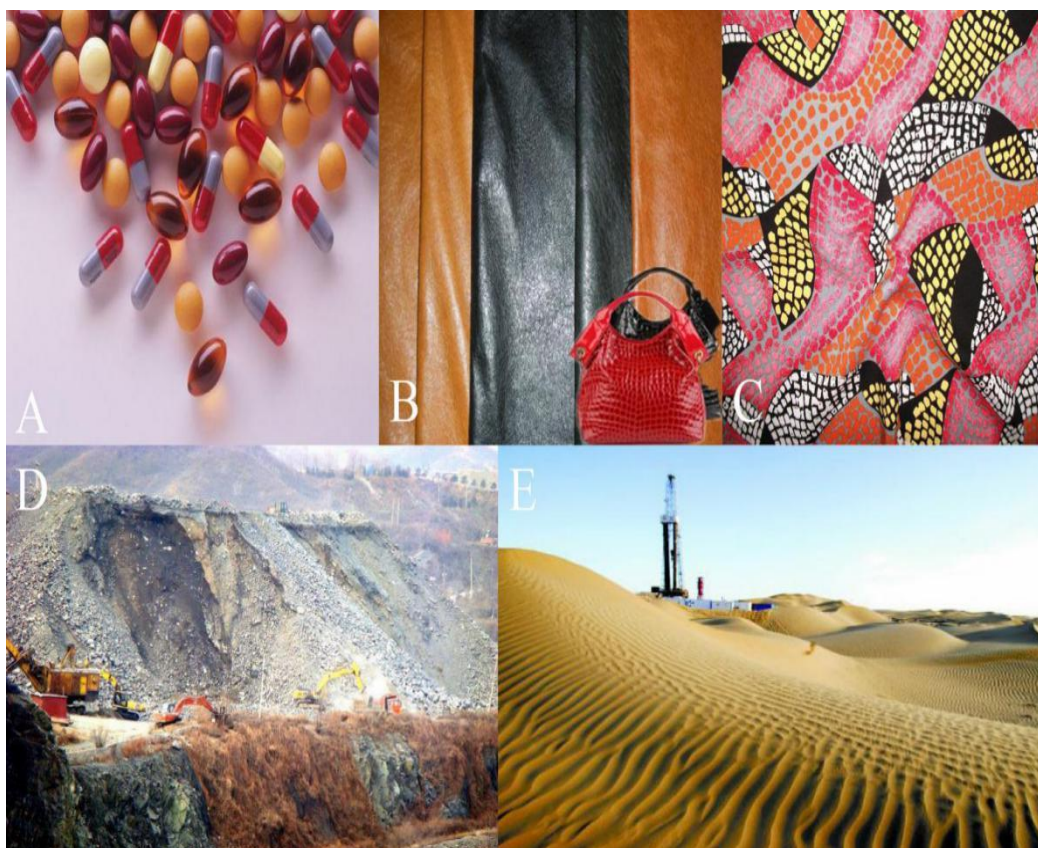

**Figure S1. Utilization of tannic acid derived from gallnut of *R. chinensis*.** A. Medicine (synergist); B. Leatherworking; C. Textile printing; D. Mineral separation; E. Oil exploration.

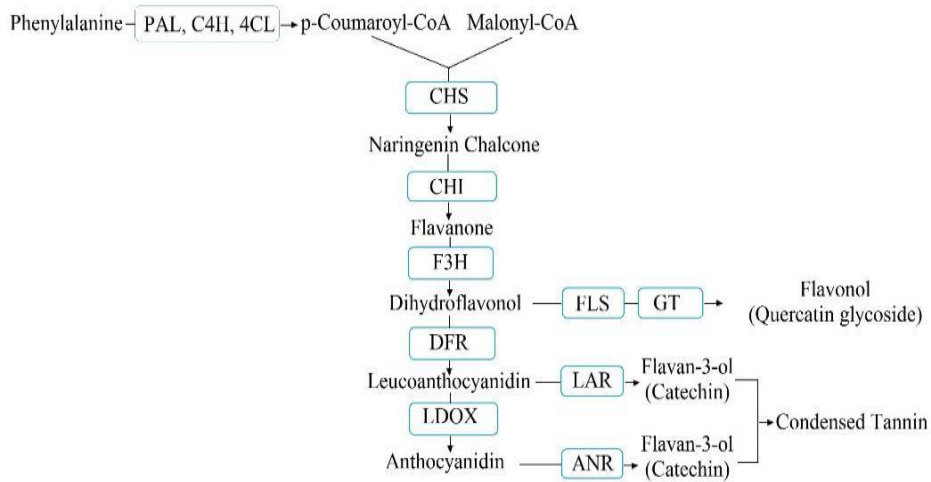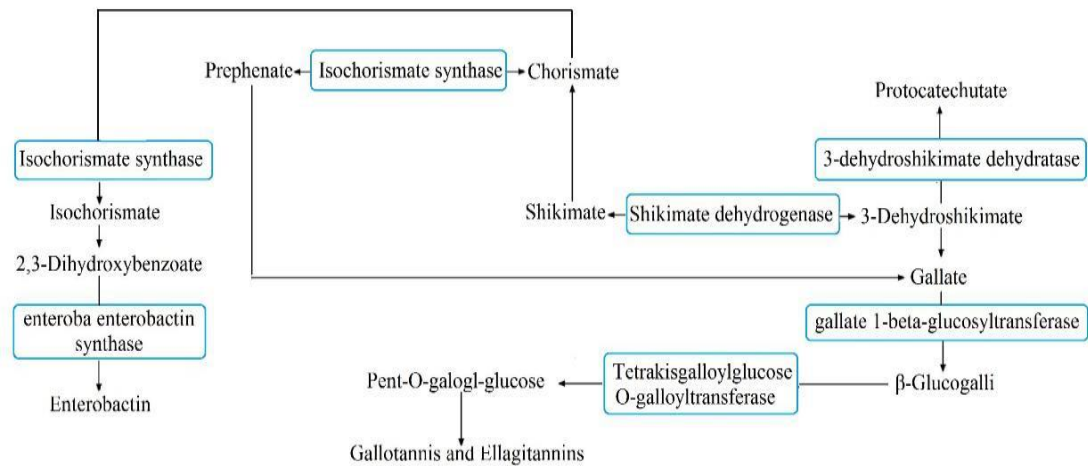

**Figure S2 The pathways of Tannins biosynthesis. A. The procession of condensed tannin biosynthesis, PAL (phenylalanine ammonialyase); C4H (cinnamate 4-hydroxylase); 4CL (4-coumarate CoA ligase); CHS (chalcone synthase); DFR (dihydroflavonol 4-reductase); LAR (leucoanthocyanidin reductase); ANR (anthocyanidin reductase); B. The procession of gallotannin biosynthesis.**

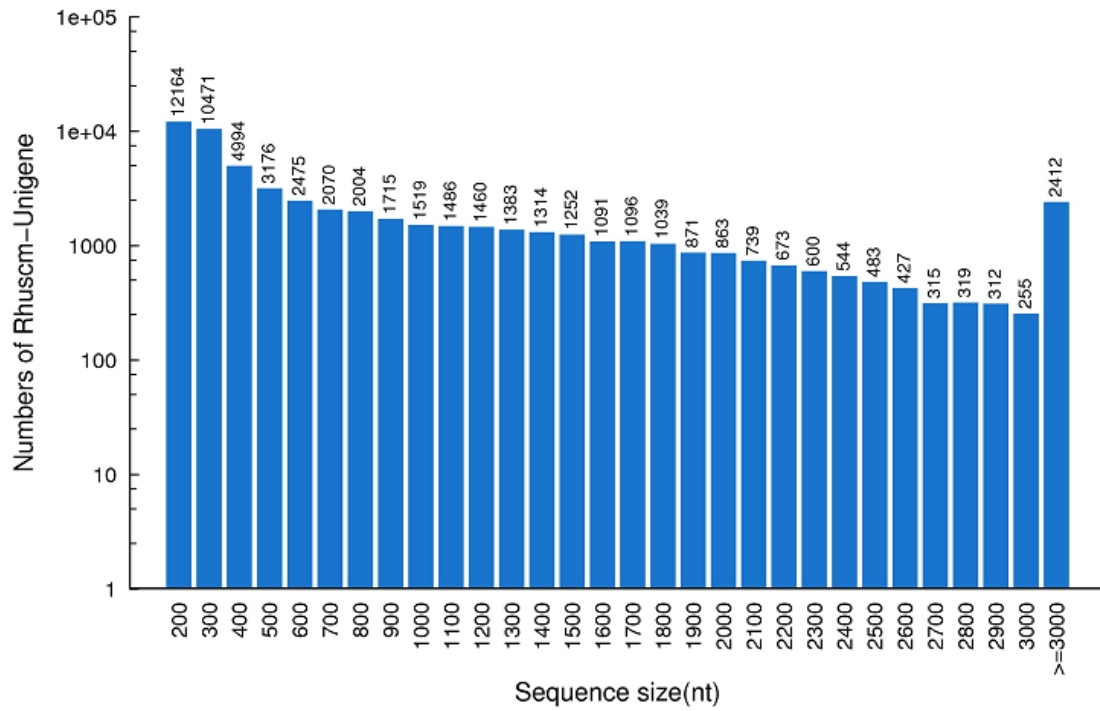

Figure S3 Length distribution of unigenes of *R. chinensis*

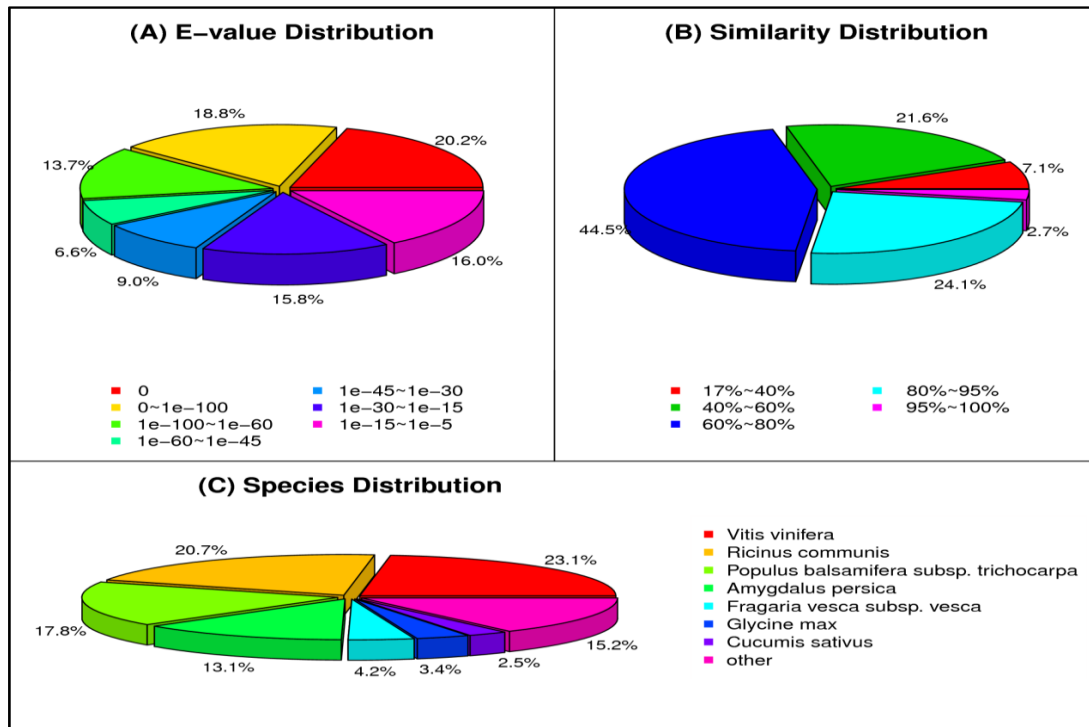

Figure S4. Data of Nr classification. (A) The E-value distribution of the result of Nr annotation. (B) The similarity distribution of the result of Nr annotation. (C) The species distribution of the result of Nr annotation.

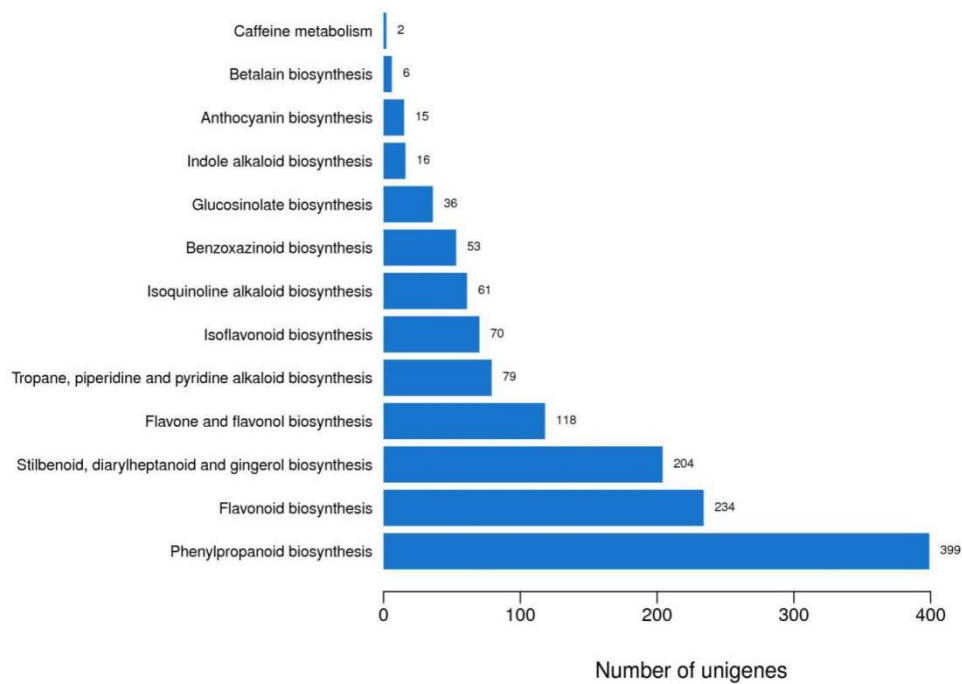

**Figure S5. Pathway on biosynthesis of other secondary metabolites by KEGG.** X-axis is the number of unigenes which annotated each pathway and y-axis is the sub-pathway.

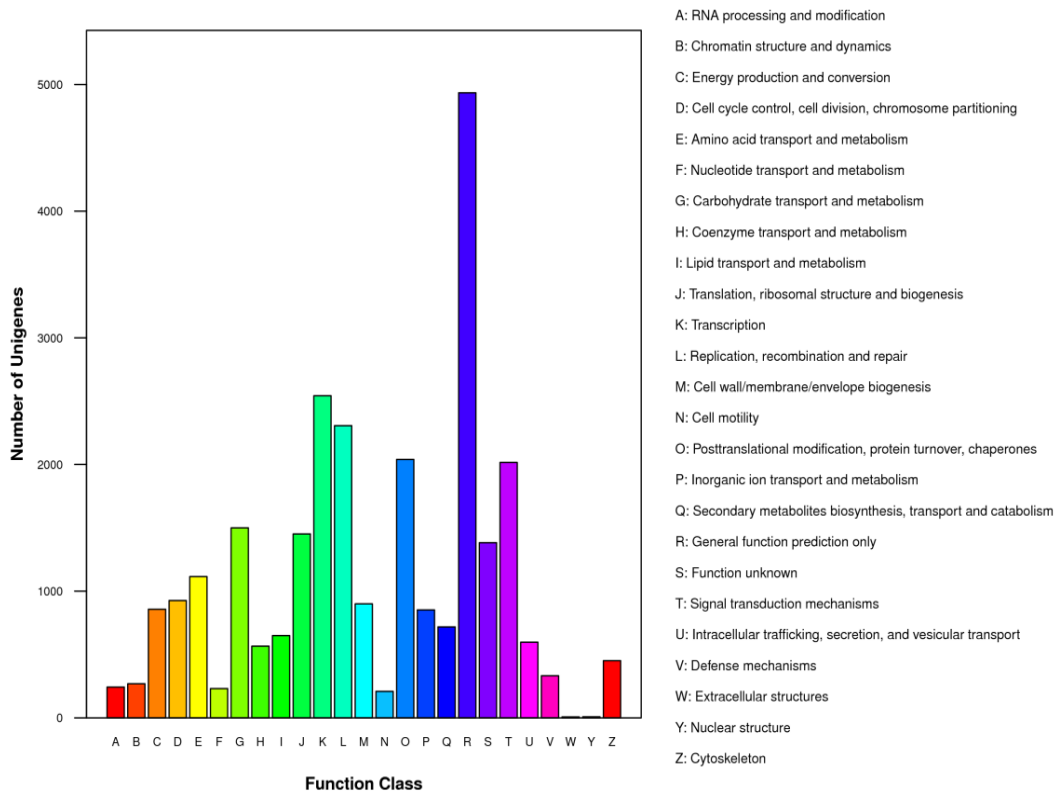

**Figure S6. COG function classification of Unigenes.** The horizontal coordinates are function classes of COG and the vertical coordinates are numbers of Unigenes in one class. The notation on the right is the full name of the functions in X-axis.

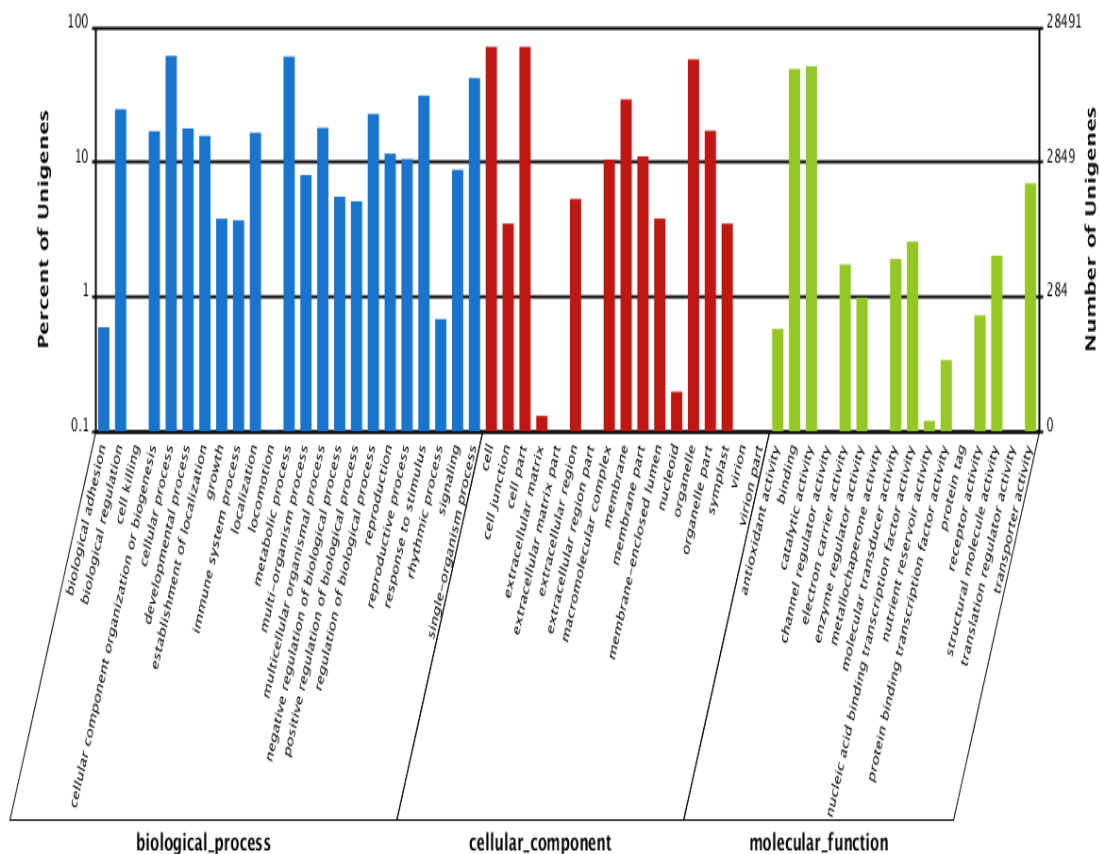

Figure S7. GO classification analysis of Unigenes in All-Unigene. GO functions is showed in X-axis. The right Y-axis shows the number of genes which have the GO function, and the left Y-axis shows the percentage.

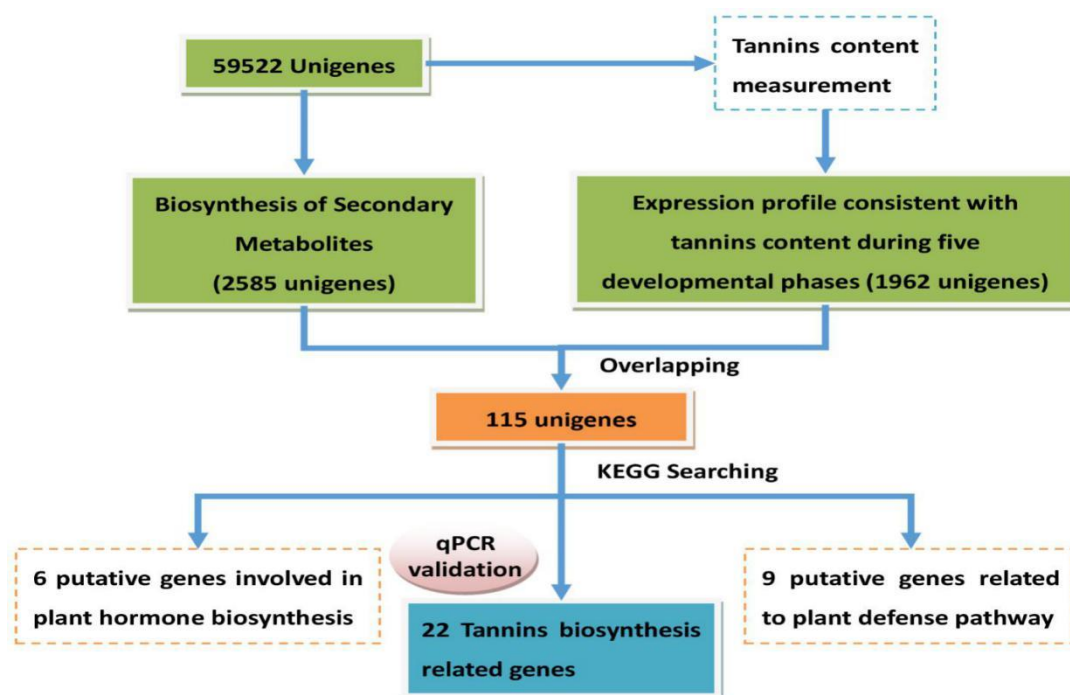

Figure S8. Selective strategy of putative genes related to condensed tannin biosynthesis, plant defense and hormone pathway from the whole unigenes of transcriptome data.

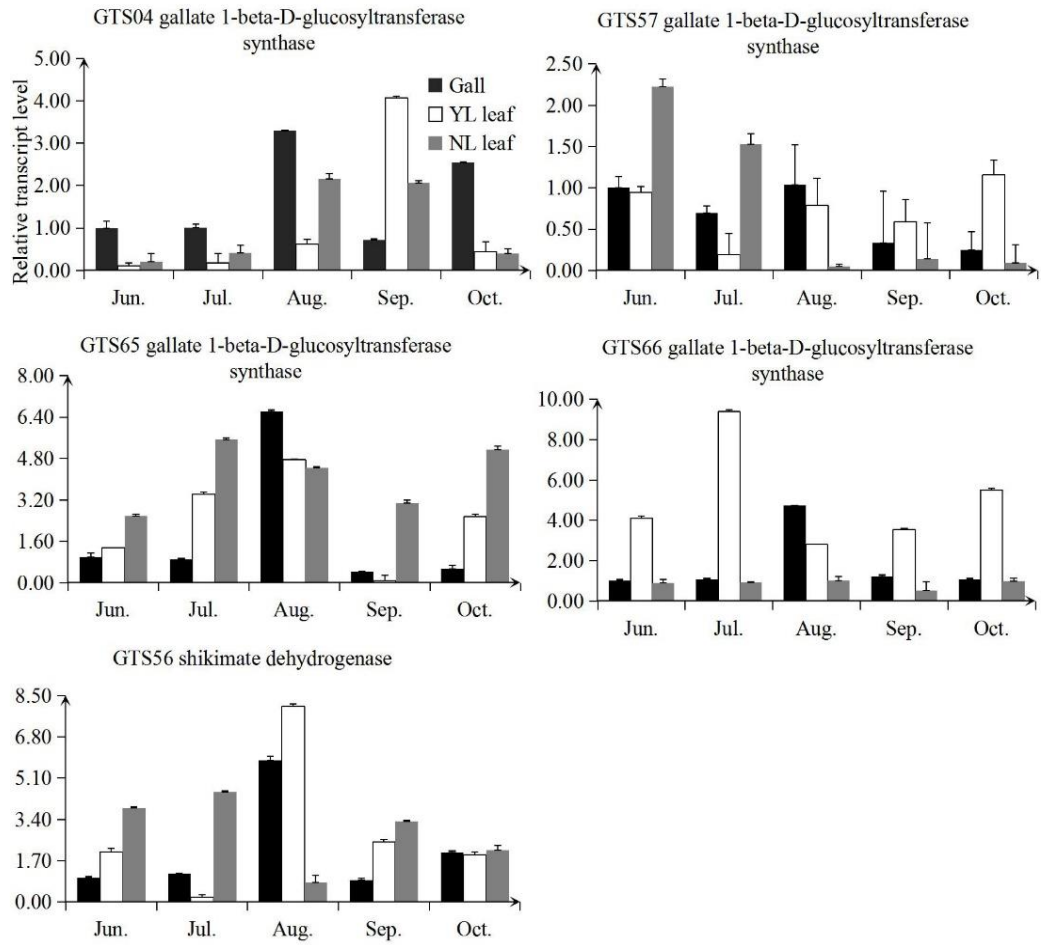

**Figure S9. qPCR analyses of changes in transcript abundance of 5 putative genes related to gallotannin biosynthesis of *R. chinensis* in different developmental stage showing similar levels in gallnut than in leaf.**

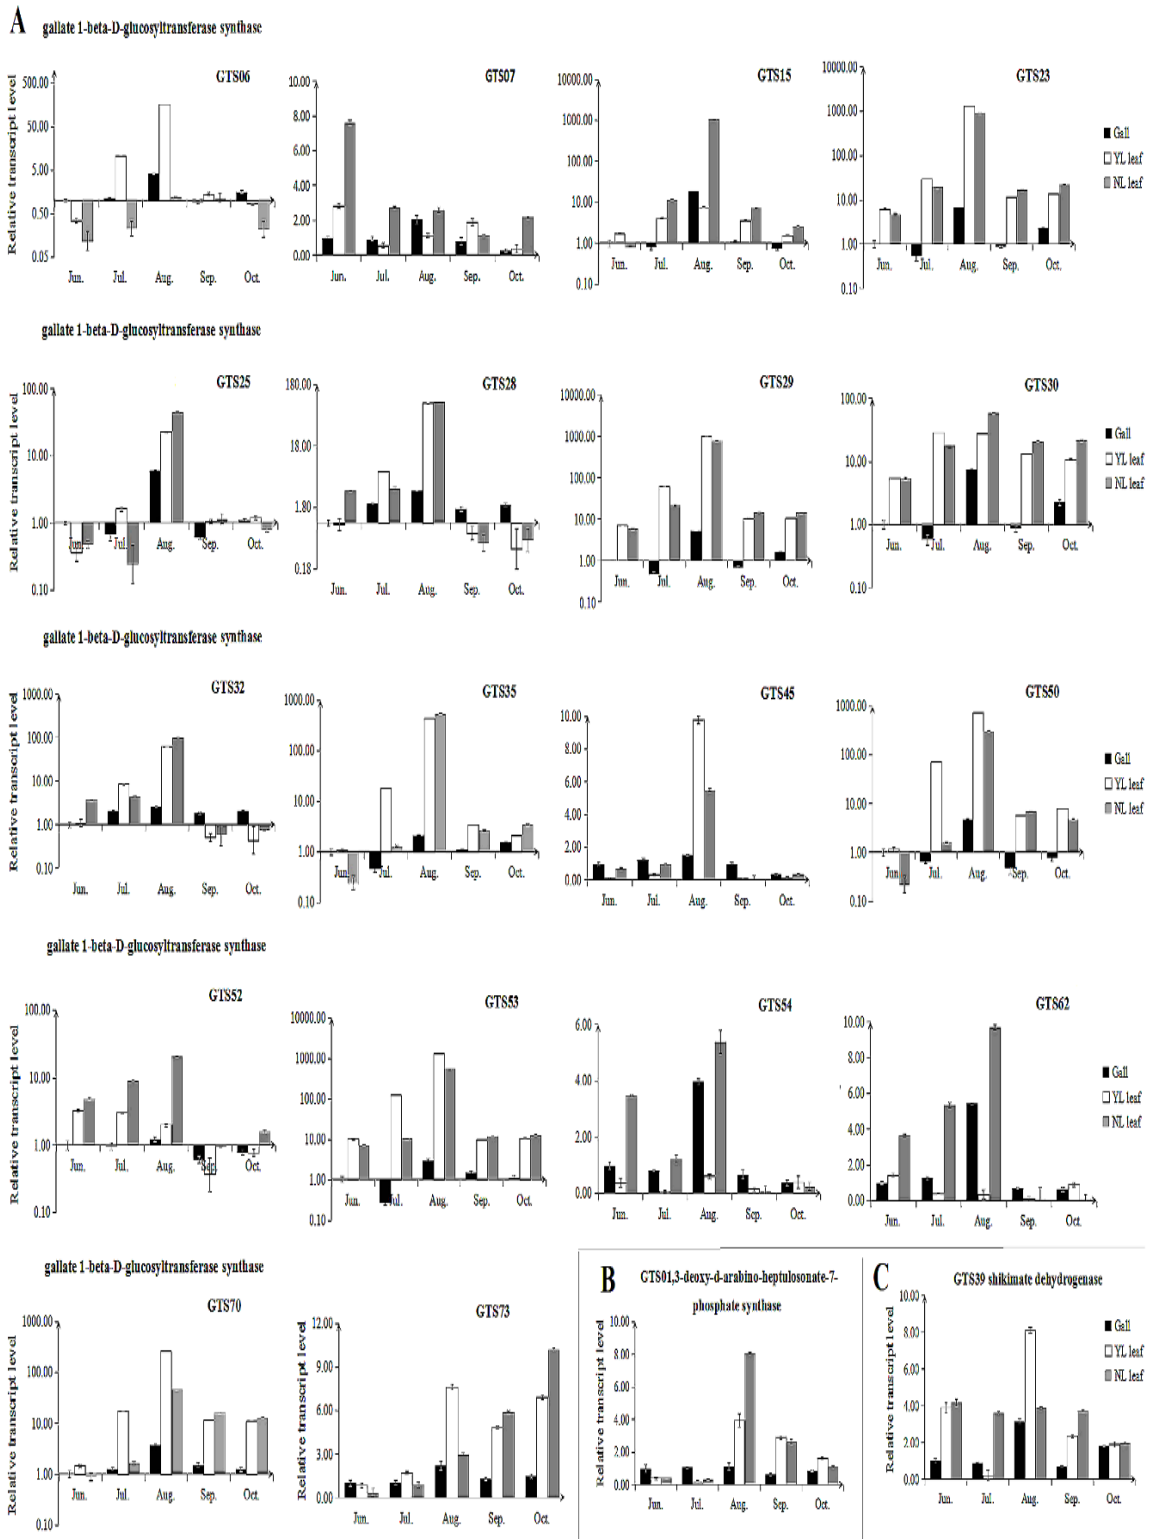

**Figure S10.** qPCR analyses of changes in transcript abundance of 20 putative genes related to gallotannin biosynthesis of *R. chinensis* in different developmental stage show higher levels in leaf than in gallnut.



**Table S1 The weight percentage of tannin in gallnut during different developmental stage of *Rhus chinensis***

|             | Jun.21 | Jul.26 | Aug.8  | Aug.18 | Aug.28 | Sep.10 | Sep. 24 | Oct.12 |
|-------------|--------|--------|--------|--------|--------|--------|---------|--------|
| <b>1</b>    | 0.3882 | 0.7075 | 0.7279 | 0.7005 | 0.6823 | 0.6825 | 0.6559  | 0.5937 |
| <b>2</b>    | 0.3736 | 0.5819 | 0.7621 | 0.7179 | 0.6538 | 0.6536 | 0.5874  | 0.5840 |
| <b>3</b>    | 0.3883 | 0.6780 | 0.7537 | 0.7224 | 0.7083 | 0.6769 | 0.6419  | 0.5871 |
| <b>Ave.</b> | 0.3834 | 0.6558 | 0.7479 | 0.7136 | 0.6815 | 0.6710 | 0.6284  | 0.5883 |
| <b>SE</b>   | 0.0085 | 0.0657 | 0.0178 | 0.0116 | 0.0273 | 0.0153 | 0.0362  | 0.0049 |

**Table S2 The weight percentage of tannin in leaf during different developmental stage of *R. chinensis***

|             | Jun.21 | Jul.26 | Aug.8  | Aug.18 | Aug.28 | Sep.10 | Sep. 24 | Oct.12 |
|-------------|--------|--------|--------|--------|--------|--------|---------|--------|
| <b>1</b>    | 0.0272 | 0.0317 | 0.0389 | 0.0170 | 0.0280 | 0.0335 | 0.0361  | 0.0303 |
| <b>2</b>    | 0.0293 | 0.0301 | 0.0435 | 0.0233 | 0.0314 | 0.0276 | 0.0435  | 0.0332 |
| <b>3</b>    | 0.0275 | 0.0457 | 0.0646 | 0.0200 | 0.0338 | 0.0338 | 0.0423  | 0.0303 |
| <b>Ave.</b> | 0.0280 | 0.0359 | 0.0490 | 0.0201 | 0.0311 | 0.0316 | 0.0406  | 0.0313 |
| <b>SE</b>   | 0.0019 | 0.0086 | 0.0137 | 0.0032 | 0.0029 | 0.0035 | 0.0040  | 0.0017 |

**Table S3 The weight percentage of condensed tannin in gallnut during different developmental stage of *Rhus chinensis***

|             | Jun.21 | Jul.26 | Aug.8 | Aug.18 | Aug.28 | Sep.10 | Sep. 24 | Oct.12 |
|-------------|--------|--------|-------|--------|--------|--------|---------|--------|
| <b>1</b>    | 0.68%  | 0.36%  | 0.31% | 0.38%  | 1.19%  | 0.70%  | 0.55%   | 1.77%  |
| <b>2</b>    | 0.64%  | 0.35%  | 0.30% | 0.35%  | 0.95%  | 0.63%  | 0.55%   | 1.79%  |
| <b>3</b>    | 0.78%  | 0.34%  | 0.32% | 0.37%  | 1.05%  | 0.65%  | 0.47%   | 1.86%  |
| <b>Ave.</b> | 0.70%  | 0.37%  | 0.32% | 0.42%  | 0.90%  | 0.67%  | 0.39%   | 1.92%  |
| <b>SE</b>   | 0.07%  | 0.01%  | 0.01% | 0.01%  | 0.12%  | 0.03%  | 0.05%   | 0.05%  |

**Table S4 The weight percentage condensed tannin in leaf during different developmental stage of *R. chinensis***

|             | Jun.21 | Jul.26 | Aug.8  | Aug.18 | Aug.28 | Sep.10 | Sep. 24 | Oct.12 |
|-------------|--------|--------|--------|--------|--------|--------|---------|--------|
| <b>1</b>    | 6.63%  | 10.21% | 12.86% | 8.65%  | 6.57%  | 8.05%  | 10.38%  | 11.64% |
| <b>2</b>    | 5.36%  | 9.67%  | 12.29% | 9.12%  | 6.78%  | 8.29%  | 9.99%   | 11.68% |
| <b>3</b>    | 5.34%  | 9.24%  | 12.34% | 7.79%  | 6.06%  | 7.42%  | 11.08%  | 10.69% |
| <b>Ave.</b> | 5.78%  | 9.71%  | 12.50% | 8.52%  | 6.47%  | 7.92%  | 10.48%  | 11.34% |
| <b>SE</b>   | 0.74%  | 0.48%  | 0.31%  | 0.68%  | 0.37%  | 0.45%  | 0.55%   | 0.56%  |

**Table S5 Output statistics of sequencing**

| Samples       | Total Raw Reads | Total Clean Reads | Total Clean Nucleotides (nt) | Q20 percentage | N percentage | GC percentage |
|---------------|-----------------|-------------------|------------------------------|----------------|--------------|---------------|
| <b>Rhuscm</b> | 86,165,236      | 80,033,622        | 7,203,025,980                | 97.85%         | 0.00%        | 43.73%        |

**Table S6 Statistics of assembly quality**

|                | Sample | Total Number | Total Length(nt) | Mean Length(nt) | N50  | Total Consensus Sequences | Distinct Clusters | Distinct Singletons |
|----------------|--------|--------------|------------------|-----------------|------|---------------------------|-------------------|---------------------|
| <b>Contig</b>  | Rhuscm | 88,592       | 43,027,436       | 486             | 1224 | -                         | -                 | -                   |
| <b>Unigene</b> | Rhuscm | 59,522       | 52,899,372       | 889             | 1675 | 59,522                    | 15,125            | 44,397              |

**Table S7. RPKM of 81 putative genes related to gallotannin biosynthesis**

| Gene name    | Jun.   | Jul.   | Aug.   | Sept.  | Oct.   | Average | Functional categories |
|--------------|--------|--------|--------|--------|--------|---------|-----------------------|
| <b>GTS38</b> | 286.62 | 459.01 | 295.53 | 192.21 | 418.97 | 330.47  |                       |
| <b>GTS17</b> | 110.79 | 202.42 | 244.97 | 81.79  | 136.13 | 155.22  |                       |
| <b>GTS43</b> | 139.36 | 145.16 | 103.95 | 114.59 | 261.29 | 152.87  |                       |
| <b>GTS22</b> | 75.28  | 158.56 | 155.61 | 80.14  | 119.59 | 117.84  |                       |
| <b>GTS63</b> | 31.36  | 86.94  | 41.88  | 39.41  | 247.34 | 89.39   |                       |
| <b>GTS15</b> | 29.66  | 107.54 | 270.72 | 6.71   | 21.84  | 87.29   |                       |
| <b>GTS30</b> | 62.91  | 71.56  | 209.98 | 13.70  | 32.90  | 78.21   |                       |
| <b>GTS27</b> | 24.10  | 21.42  | 223.27 | 12.25  | 25.20  | 61.25   |                       |
| <b>GTS23</b> | 50.83  | 43.13  | 129.54 | 6.25   | 35.20  | 52.99   |                       |
| <b>GTS58</b> | 36.07  | 28.49  | 143.29 | 27.43  | 21.77  | 51.41   |                       |
| <b>GTS67</b> | 58.90  | 66.30  | 35.16  | 32.40  | 57.46  | 50.04   |                       |
| <b>GTS53</b> | 30.16  | 22.21  | 82.57  | 5.44   | 51.33  | 38.34   |                       |
| <b>GTS04</b> | 10.19  | 12.56  | 12.76  | 40.67  | 82.41  | 31.72   |                       |
| <b>GTS35</b> | 35.21  | 6.14   | 53.60  | 10.82  | 36.99  | 28.55   |                       |
| <b>GTS41</b> | 32.56  | 6.48   | 51.70  | 13.89  | 37.60  | 28.45   |                       |
| <b>GTS11</b> | 11.07  | 14.04  | 16.05  | 38.60  | 52.48  | 26.45   |                       |
| <b>GTS66</b> | 19.31  | 16.89  | 30.71  | 20.79  | 40.96  | 25.73   | UDP-glucose           |
| <b>GTS14</b> | 8.83   | 4.06   | 88.54  | 2.34   | 12.26  | 23.21   |                       |
| <b>GTS42</b> | 23.34  | 25.31  | 17.45  | 18.91  | 17.49  | 20.50   |                       |
| <b>GTS70</b> | 14.24  | 14.17  | 21.05  | 15.46  | 32.23  | 19.43   |                       |
| <b>GTS18</b> | 13.58  | 20.24  | 22.43  | 29.90  | 9.37   | 19.10   |                       |
| <b>GTS45</b> | 15.78  | 14.61  | 16.41  | 25.75  | 16.24  | 17.76   |                       |
| <b>GTS52</b> | 18.53  | 14.38  | 24.96  | 11.05  | 3.66   | 14.52   |                       |
| <b>GTS50</b> | 11.90  | 1.78   | 25.47  | 5.37   | 16.00  | 12.10   |                       |
| <b>GTS32</b> | 14.55  | 0.08   | 17.75  | 7.77   | 8.27   | 9.68    |                       |
| <b>GTS29</b> | 12.73  | 4.58   | 19.74  | 2.61   | 4.40   | 8.81    |                       |
| <b>GTS77</b> | 3.82   | 8.69   | 2.53   | 21.17  | 3.71   | 7.98    |                       |
| <b>GTS25</b> | 7.09   | 11.40  | 12.85  | 5.17   | 3.28   | 7.96    |                       |
| <b>GTS65</b> | 4.52   | 13.12  | 4.40   | 2.47   | 12.63  | 7.43    |                       |
| <b>GTS31</b> | 10.56  | 9.07   | 7.19   | 5.12   | 4.92   | 7.37    |                       |
| <b>GTS54</b> | 7.71   | 0.00   | 3.06   | 16.59  | 0.00   | 5.47    |                       |
| <b>GTS06</b> | 9.34   | 0.02   | 3.16   | 0.00   | 12.22  | 4.95    |                       |
| <b>GTS73</b> | 4.75   | 0.63   | 1.50   | 9.28   | 5.34   | 4.30    |                       |

|              |         |         |         |         |         |         |                                           |
|--------------|---------|---------|---------|---------|---------|---------|-------------------------------------------|
| <b>GTS36</b> | 3.81    | 1.97    | 4.15    | 6.08    | 4.83    | 4.17    |                                           |
| <b>GTS55</b> | 2.43    | 2.60    | 2.17    | 1.19    | 11.06   | 3.89    |                                           |
| <b>GTS28</b> | 0.00    | 18.02   | 0.86    | 0.14    | 0.14    | 3.83    |                                           |
| <b>GTS83</b> | 1.79    | 1.49    | 0.76    | 0.37    | 12.40   | 3.36    |                                           |
| <b>GTS76</b> | 7.70    | 1.27    | 1.06    | 2.31    | 3.10    | 3.09    |                                           |
| <b>GTS82</b> | 3.02    | 1.74    | 5.99    | 0.33    | 3.79    | 2.97    |                                           |
| <b>GTS85</b> | 3.70    | 1.88    | 0.79    | 2.22    | 0.71    | 1.86    |                                           |
| <b>GTS78</b> | 0.31    | 0.91    | 0.93    | 1.21    | 3.32    | 1.34    |                                           |
| <b>GTS07</b> | 0.28    | 0.14    | 0.00    | 0.00    | 5.97    | 1.28    |                                           |
| <b>GTS68</b> | 1.75    | 1.63    | 0.25    | 0.30    | 0.62    | 0.91    | UDP-glucose                               |
| <b>GTS71</b> | 1.73    | 0.00    | 1.06    | 1.63    | 0.00    | 0.88    |                                           |
| <b>GTS74</b> | 0.00    | 0.40    | 2.29    | 0.00    | 0.81    | 0.70    |                                           |
| <b>GTS10</b> | 508.34  | 225.79  | 283.61  | 426.71  | 21.16   | 293.12  |                                           |
| <b>GTS13</b> | 258.63  | 127.14  | 162.74  | 288.85  | 21.55   | 171.78  |                                           |
| <b>GTS39</b> | 48.56   | 32.20   | 77.15   | 32.16   | 43.43   | 46.70   |                                           |
| <b>GTS26</b> | 29.73   | 43.68   | 65.98   | 20.08   | 52.54   | 42.40   |                                           |
| <b>GTS56</b> | 19.89   | 29.27   | 18.90   | 48.81   | 25.44   | 28.46   | Shikimate<br>dehydrogenase                |
| <b>GTS51</b> | 7.33    | 0.73    | 11.86   | 12.49   | 51.10   | 16.70   |                                           |
| <b>GTS44</b> | 9.10    | 2.52    | 11.48   | 6.46    | 8.97    | 7.71    |                                           |
| <b>GTS49</b> | 5.03    | 0.25    | 6.50    | 6.39    | 13.92   | 6.42    |                                           |
| <b>GTS60</b> | 4.44    | 2.75    | 3.47    | 10.60   | 6.07    | 5.47    |                                           |
| <b>GTS33</b> | 0.96    | 0.93    | 7.37    | 3.48    | 0.82    | 2.71    |                                           |
| <b>GTS16</b> | 11.09   | 11.99   | 10.27   | 12.31   | 14.14   | 11.96   |                                           |
| <b>GTS46</b> | 7.55    | 6.16    | 5.66    | 7.38    | 3.44    | 6.04    |                                           |
| <b>GTS19</b> | 1.88    | 6.18    | 7.02    | 4.23    | 1.82    | 4.23    |                                           |
| <b>GTS64</b> | 4.67    | 2.48    | 1.09    | 4.57    | 1.20    | 2.80    | isochorismate                             |
| <b>GTS69</b> | 5.64    | 3.00    | 1.02    | 3.01    | 0.50    | 2.63    | synthase                                  |
| <b>GTS75</b> | 3.12    | 2.00    | 0.57    | 2.81    | 0.64    | 1.83    | synthase                                  |
| <b>GTS79</b> | 2.89    | 1.73    | 0.66    | 0.65    | 0.11    | 1.21    |                                           |
| <b>GTS84</b> | 0.70    | 0.80    | 1.28    | 0.46    | 1.13    | 0.87    |                                           |
| <b>GTS09</b> | 0.47    | 1.38    | 0.00    | 0.78    | 0.53    | 0.63    |                                           |
| <b>GTS59</b> | 97.03   | 188.33  | 63.48   | 13.93   | 50.30   | 82.61   |                                           |
| <b>GTS24</b> | 10.38   | 17.57   | 34.38   | 20.19   | 7.02    | 17.91   | chorismate mutase                         |
| <b>GTS37</b> | 7.49    | 5.92    | 7.44    | 3.32    | 3.69    | 5.57    |                                           |
| <b>GTS80</b> | 0.36    | 1.07    | 0.36    | 0.71    | 0.00    | 0.50    |                                           |
| <b>GTS12</b> | 1526.07 | 2515.44 | 2447.76 | 4405.86 | 2139.91 | 2607.01 |                                           |
| <b>GTS40</b> | 138.32  | 204.95  | 277.22  | 83.42   | 91.40   | 159.06  | 3-deoxy-d-<br>arabino-<br>heptulosonate-7 |
| <b>GTS48</b> | 106.45  | 109.16  | 48.06   | 86.01   | 28.93   | 75.72   | -phosphate                                |
| <b>GTS34</b> | 48.29   | 112.16  | 53.85   | 45.67   | 17.94   | 55.58   | synthase                                  |
| <b>GTS61</b> | 61.05   | 87.78   | 14.44   | 56.82   | 11.28   | 46.27   |                                           |
| <b>GTS01</b> | 13.96   | 4.70    | 4.85    | 2.96    | 2.18    | 5.73    |                                           |
| <b>GTS20</b> | 126.09  | 137.69  | 191.76  | 333.14  | 78.90   | 173.52  | 3-dehydroquinate                          |
| <b>GTS21</b> | 83.43   | 124.74  | 136.90  | 255.80  | 54.20   | 131.01  | synthase (DHQ                             |
| <b>GTS72</b> | 4.64    | 5.71    | 2.13    | 0.00    | 0.51    | 2.60    | synthase)                                 |

|              |      |      |      |      |      |      |
|--------------|------|------|------|------|------|------|
| <b>GTS62</b> | 0.28 | 0.81 | 0.82 | 0.01 | 0.87 | 0.56 |
| <b>GTS03</b> | 1.82 | 0.00 | 0.48 | 0.00 | 0.00 | 0.46 |
| <b>GTS02</b> | 0.15 | 0.00 | 0.30 | 0.01 | 0.00 | 0.09 |

**Table S8. Twenty-two putative genes related to tannin biosynthesis**

| No. | Gene name | KEGG Orthology | Enzyme                                                         | Pathway                                |
|-----|-----------|----------------|----------------------------------------------------------------|----------------------------------------|
| 1   | TS-1      | K00224         | leucoanthocyanidin reductase                                   |                                        |
| 2   | TS-2      | K06892         | leucoanthocyanidin dioxygenase                                 |                                        |
| 3   | TS-3      | K13082         | bifunctional dihydroflavonol 4-reductase/flavanone 4-reductase | flavonoid biosynthesis                 |
| 4   | TS-4      | K05277         | leucoanthocyanidin dioxygenase                                 |                                        |
| 5   | TS-5      | K13229         | leucoanthocyanidin dioxygenase                                 |                                        |
| 6   | TS-6      | K06892         | leucoanthocyanidin dioxygenase                                 |                                        |
| 7   | TS-7      | K05279         | flavonol 3-O-methyltransferase                                 |                                        |
| 8   | TS-8      | K05280         | flavonoid 3'-monooxygenase                                     |                                        |
| 9   | TS-9      | K01904         | 4-coumarate--CoA ligase                                        |                                        |
| 10  | TS-10     | K01904         | 4-coumarate--CoA ligase                                        | flavone and flavonol biosynthesis      |
| 11  | TS-11     | K01904         | 4-coumarate--CoA ligase                                        |                                        |
| 12  | TS-12     | K10526         | 4-coumarate--CoA ligase                                        |                                        |
| 13  | TS-13     | K10526         | 4-coumarate--CoA ligase                                        |                                        |
| 14  | TS-14     | K13493         | anthocyanidin 3-O-glucosyltransferase                          | anthocyanin and flavanone biosynthesis |
| 15  | TS-15     | K10775         | phenylalanine ammonia-lyase                                    |                                        |
| 16  | TS-16     | K13267         | flavonoid 6-hydroxylase                                        |                                        |
| 17  | TS-17     | K13267         | flavonoid 6-hydroxylase                                        |                                        |
| 18  | TS-18     | K13258         | 2-hydroxyisoflavanone dehydratase                              | isoflavonoid biosynthesis              |
| 19  | TS-19     | K13258         | 2-hydroxyisoflavanone dehydratase                              |                                        |
| 20  | TS-20     | K13258         | 2-hydroxyisoflavanone dehydratase                              |                                        |

|    |       |        |                                      |
|----|-------|--------|--------------------------------------|
| 21 | TS-21 | K13258 | 2-hydroxyisoflavanone<br>dehydratase |
| 22 | TS-22 | K13258 | 2-hydroxyisoflavanone<br>dehydratase |

**Table S9. Fifteen putative genes related to plant defense system and hormone biosynthesis**

| No. | Gene name | KEGG<br>Orthology | Enzyme                                                      | Pathway                                      |
|-----|-----------|-------------------|-------------------------------------------------------------|----------------------------------------------|
| 1   | PD-1      | K01183            | chitinase                                                   |                                              |
| 2   | PD-2      | K15563            | chitinase                                                   | plant antibacterial<br>activity              |
| 3   | PD-3      | K01183            | chitinase                                                   |                                              |
| 4   | PD-4      | K01183            | chitinase                                                   |                                              |
| 5   | PD-5      | K00517            | cytochrome P450                                             |                                              |
| 6   | PD-6      | K13407            | cytochrome P450                                             | cuticle, tethered layer<br>and wax synthesis |
| 7   | PD-7      | K11818            | cytochrome P450                                             |                                              |
| 8   | PD-8      | K15086            | (3S)-linalool synthase                                      |                                              |
| 9   | PD-9      | K00511            | squalene monooxygenase                                      | plant terpenoid<br>synthesis                 |
| 10  | PHS-1     | K00227            | lathosterol oxidase                                         |                                              |
| 11  | PHS-2     | K10760            | adenylate<br>isopentenyltransferase<br>(cytokinin synthase) | plant hormone<br>synthesis                   |
| 12  | PHS-3     | K12619            | adenylate<br>isopentenyltransferase<br>(cytokinin synthase) |                                              |
| 13  | PHS-4     | K10760            | adenylate<br>isopentenyltransferase<br>(cytokinin synthase) |                                              |
| 14  | PHS-5     | K10760            | adenylate<br>isopentenyltransferase<br>(cytokinin synthase) |                                              |
| 15  | PHS-6     | K05282            | gibberellin 20-oxidase                                      |                                              |

**Table S10 The quantitative PCR primers of 12 candidate genes in gallnut of *R. chinensis***

| Gene ID | Primer sequence           | Tm   | Gene length |
|---------|---------------------------|------|-------------|
| TS-18   | AATGTTGACTGTTTGGTGAGGG    | 59   | 111         |
|         | GGAAAGTATTATCGTCTCGTCGTT  | 59.3 |             |
| TS-19   | GAAATGGACCTGAAACTTGGC     | 58.8 | 125         |
|         | GACTAATCCGATTGACCCGAC     | 58.5 |             |
| TS-15   | TAGTTCCTCCTCAAAGGCTCC     | 57.9 | 212         |
|         | TTCACCCATCAAGTTCTGC       | 58.1 |             |
| TS-2    | GGAGGATACAGTGCGGGTTT      | 58.9 | 153         |
|         | CAATGCGAATTACAAGAGCGT     | 58.4 |             |
| TS-4    | AAGAATCCCCATTACGACA       | 57   | 181         |
|         | TTCCAGAGCGATACATCAAGC     | 58.5 |             |
| TS-14   | TGTATGCCTTGTTTCACTGACC    | 57.7 | 72          |
|         | TTGCACCCCAACTTTCCA        | 57.4 |             |
| TS-8    | AACAGGCATACAGGCGAGAT      | 57.2 | 182         |
|         | TGCAGCAGGCAAGTTCATAG      | 57.9 |             |
| TS-9    | AGAGCCTGTTTTCTGTTTCGTC    | 58.1 | 164         |
|         | TTACTGGGTTCCAAAGTCCGT     | 58.8 |             |
| PD-1    | CTGTTTTGGATGGGATTGACTT    | 58.4 | 137         |
|         | AGGAAATGGACACTGAGGAGC     | 58.2 |             |
| PD-8    | CCCTTCACCCTGTGTTCTAATC    | 58   | 219         |
|         | TTTTCAGCCAGTGCTACGG       | 57.1 |             |
| PHS-1   | TGTTGTCAAGAAGGTGGTTTACTAT | 57.4 | 106         |
|         | TTCCATGCTTCTGACATCTGT     | 57.3 |             |
| PHS-2   | TAACTCAGCCCGTCATTTCTTT    | 58.7 | 71          |
|         | GTGGGACATATTTGGATTTTGC    | 58.9 |             |
| Actin   | CATCACTCATCGGTATGGAAGC    | 59.6 | 164         |
|         | AGTGATTTCCTTGCTCATACGGT   | 59.9 |             |

**Dataset S1.** The amino acid sequences translated by the twenty-two putative genes related to condensed tannin biosynthesis in gallnuts of *R. chinensis* after aphids feeding.

TS-1

M G K S K V L V V G A T G Y I G R R I V K A S L A Q G H T T Y V L Q  
R P E I G L D I E K I Q M L L S F K Q E G A I L V E G S F S D H K S L  
V D A V K K V D V V I C T M S G \*

TS-2

M K I L S L E L G L R E N H L Q N A F G G E N I G A C L R V N F Y P  
K C P Q P D L T L G L S S H S D P G G L T M L L P D D Q V A G L Q V  
R K G D N W I T V K P A K H A F I V N I G D Q I Q V L S N A N Y K S  
V E H R V I V N P E Q E R V S L A F F Y N P K S D I P I E P V K E L V  
T P D K P A L Y P P M T F D E Y R L F I R L R G P R G K S Q V D S M  
K S P K C Y \*

TS-3

G T L G I L K A C V N S K T V K R V V Y T S S A S A V T F S S N D Q  
E I V D E I V H G V T \*

TS-4

M N K L Q S W P E P I V R V Q S L S E S G L N K I P E R Y I K P S T E  
R P S F S S E N G I D H H N V N I P I I D L A G L F Q D D Q N V R A Q  
I I S Q V N M A C R E W G F F Q I L N H G V R P E L M D Q A R E T W  
R Q F F H A P M E L K Q A Y A N S P K T Y E G Y G S R L G V E K G  
A I L D W R D Y Y F L \*

TS-5

M A A Y D R R K E V E E F D S S K I G V K G L S D S S I T S I P K I F  
I H P P E T L S T L K S S Q D D T T I T I P V I D L A K I N S P V D R P  
N I I Q Q V K E A A K S W G F F Q V I N H G I D L S V V E N T I Q A  
V K S F H E Q P A E M K A K F Y K R E E K S G V M Y A S N N D L Y  
R S K A A S W H D Y L Q V W M S P E K A K E E D I P E I C R R E A V  
A W D F H A Q M V G E E V M E L L C E G L G L E A G K F K E L T F  
S E S R L F V G I Y Y P S C P Q P D L T L G L T P H T D P G A L T V L  
L Q N Q V P G L Q I K H G D Q W V N V K P L H G S L T I N I G D F L  
Q I I S N G E Y N S V Q H R V L A N T W E E P R I S V V M F L N V T  
K W E G S G S H G P L P E L I S A E K P A V Y R K F T K E E Y Y D N  
F Y S K G L D S K S L I D K L K L \*

TS-6

M E A K V L Q K L Q Y P T W V D L D K F Q R K P S G S V R F S R R  
M R E E K R V Q V L I S A H M Q P S I T S N R N R S V T S E I S C T F  
Q G F P A S I L E P G G F H A P L D E A L I L K N K S Q E I E P Y L D  
G R C I Y L V G M M G S G K T T V G K V L S G V L G Y S F F D S D  
T L I E Q A V G G T T V T D I F K L Y G E G F F R D K E T E V L R K  
L S I M H R L V V S T G G G A V T R P I N W K Y M R N G I S V F L D  
V P L E A L A Q R I A A V G T N S R P L L H H E S G D A Y T K A L K  
R L S T L W E E R S R A Y E N A N A R V C L E N I A A K L G H R D V  
S A L T P A T I A I E A L E Q I E H F L K E E G E M P F \*

TS-7

M E E M K F L K L V V K E T L R L H P P A P L L V P R E C R E K C V I  
N G F D I P I K T R V I V N A W A I G R D P E Y W S E P E I F N P E

TS-8

L A G F N I S D L F P S I N F L Q W I T K S Q V E K L H Q E A D R I V  
E K I I N E H K K G Q A P L N I D K S E E A E D L

TS-9

M A A S D S E I V K D F R F F R V Y K D G R V Q L S F P P F V K A T  
V P P S D D P V T G V Q S K D V T I S S E P P V S A R I F I P K V T D  
P K Q K F P L L F Y V H G G G F C I M S A F A P G Y H S F C S T I S A  
Q A G A I V V S V E Y G L F P D R P I P A C Y E D S W A A L Q W V A  
S H V S G N G P E P C L N D H A D F N K V F I S G V S A G G N I S H  
T L A F R V G S I G L P G V K V V G V I L V H P Y F G G T G D D E M  
W L F M C P N N G G L Q D P R L K P P A E D L A K L G C A R V L I F

V A E K D H L N V V G K N Y L E D L K K S G W S G S V E L F E S Y  
G E G H V F H M L S P E S E K A V E L T N K F V S F L K Q D \*

TS-10

M I P R Y I Q N G F F L F I K R I E V T S L S S M A S T D S E I V N E  
F R F F R V Y K D G R V E L F S P P C P K V P P S A D P V T G V R S  
K D V T I S S E P L V S A R I F I P K L S D P N Q K F P L L F L V H G  
G G F C I M S A F A P R Y H L F C N T V S A Q A G A I V V S V E Y G  
L F P D R P I P A C Y E D S W A A L Q W V A S H V S G N G P E T W L  
N D H A D F G K V F I G G D S A G G N I S H T L S F R V G S I G L V  
G V K V V G V I L I H P Y F G G T E D D E M W L Y M N P S N S G L  
Q D P R L K P P L E D L A K F G C E R V L I F V A E K D H L N T P G K  
D Y Y E D L K K S G W \*

TS-11

M A S S T D S E I A K E F P F F R V Y K D G R V E L F R P H W D K I  
P P S D D P I T G V R S K D V T I S S E P P V S A R I F I P K L T S P T  
Q K F P L L L Y V H G G G F S M L S A F S P Q Y H N F C S T V S A L  
A G V I V V S V E Y G L F P A R P I P A C Y E D S W A A L Q W V A S  
H V N G N G P D P W L N D H A N F S K V F I G G D S A G G N I S H T  
L A F R V G S I G L P G M K V D G V I L V H P Y F G G T E D D Q M  
W L Y M N P T N G G L Q D P R L K P P A E D L G K L G C E R V L I F  
V A E K D H L Y T P G K D Y H E D L K K S G W G G E V E L V E N H  
G E E H C F H F H D P K Y E K A V E L T N K F V S F I K Q D \*

TS-12

M D S T Q P E I A Y D F S P M L I V Y K D G T V N R L T G N D I V P  
T S L D P K T N V K S K D V V Y S P E N G L S V R L Y I P K T V S Q  
N Q K L P L L V Y F H G G G F C I E S P F S P P Y H N Y L N S L V A  
E A N I V V V S V Q Y R R A P E H H L P C A Y D D S W T A L K W V  
A S H V N G S G P E D W L N S H A D F E K V F F S G D S A G A N I A  
H R M G I K H G L E K L E G V N V E G I V L C H P Y F W G N E A V  
A N E T A D E N R R K F V E A L W R F T Y P E T T G C D D L W V N  
P A V D P N L A K L G C R R V L V L V A E K D L L C A R G W Y Y H  
Q K L K E S G W G G D V E V V E T N G E Q H V F H L F N P G C E N  
A K A M I K K T A D F Y N N

TS-13

M D S S T N E V A H E Y L P Y F R A Y K D G R V E R F F G S D R V P  
V S L D G S Q N G V C S K D V V I V S E T G L S A R I F I P A G A T  
K P G Q K L P L V V Y Y H G G G F F M G T P F C S A Y N N S V S S L  
A A K A N A I A V S V D Y R L A P E H Y V P V A Y E D S W A A L K  
W V A S H C N G E G P E A W L N N Y A D F H R V F L A G D S A G G  
N M V H N M A I Q A S V E D L N G V K L S G I C L I Q P Y F G R Q D  
G G V D K W W T F V C P T T S G S D D H R I N P S V D S R L S S L R  
C N R V L I C V A E K D N L K E R G L F Y D E T L R D S E W V G E V  
E I A E T E G E D H V F H L F N P N S E K A V A L L E K I A S F I N Q

\*



TS-14

LESICEGVPMICMPCFTDQRVNARYVSDVWKVG  
VQLENGLDRENIDRTIRRLMVEKEGEEIRGRILC  
LKEKANICLRQGGSSSESL

TS-15

WRNCKTLNALLSTLHLFVETFTETISKIGINQEGI  
TVGLTSFFQVQINVMAWHRATKKVEDMSFNMST  
ASAVFLEEIRPKEFTS \*

TS-16

MNSSAIRYNEEKEESFAYAIQLVTGSVLPMTLKA  
AIDLDFEIIAKAGPGAKLSASEIASRMSAQNKDA  
PMMVDRI LRLLSSH SVLTCYVVGLERLYSLAPVS  
KYFVHDQNGVSLGPFMALIQDKVFMDSWAQLKD  
AVLEGGVPFDRVHGTHAFEYPGLDARFNQVFNTA  
MFNHTTIVINEILKVYKGFESIKQLVDVGGGLGIT  
LKAITSRYPHVTAINFDLPHVIQHAPQNPGEHV  
GGDMFESVPKGD AIFMKWILHDWSDEHCLKLLK  
NCYKSIPEDGKVIVVEGILPVM AETKVT SKGVSQ  
MDVVM MTQNP G GKERTKHEFMALATAAGFSGIR  
YECFVCNFWVMEFYK \*

TS-17

MEAFSWVVLATAWLAALVFLKRISTSWRQSLNSI  
PGPKPWPIIGNLNLIGPLPHQSLHKLAQKYGSIMQ  
LKFGSFPVVVASSAEMAKLFLRTHDHIFASRPPT  
AAGKYTTYNYLNITWAPYGPYWRQGRKMYLAEL  
FSSKRLESYEYIRVEELRDSMSRLYALSGKPIVLK  
DHLSRFTLSIISRIVLGKKYFCVSKSETSVVTL EE  
FQEMMDELFLNLNGVINIGDWIPWMDFLDLQGYV  
KRMKVLKKRLDRFH DHVFDEHKSKREGVKDFEA  
KDMVDLLRLR LADDPNFD AKLTSDSIKGFTQDLIA  
GGTDTAATTVEWAMSE

TS-18

MAAGNDIDDLPKNAANYTAL TPLWFLERAATVHP  
SRASLIHG SVRYTWHQTYQRCRRFASALSRRSVG  
LGSTVAVIAPNV PALYEAHFGVPMAGAVLNSVNI  
RLNAQTIAFLLGHSASAVVMVDQESFSVAEEALK  
IMEEKSKGNFKPPILIVIGDESCDPKVLEYALGRG  
AIEYEK FLETGDPEFAWKPPQDEWQSIALGYTSG  
TTASPKGVVLSHRGAYVMSMSGALIWGLNEGAV  
YLWTLPMFHCNGWCYTWSLAALCGTNICLRQVT  
AKAVYS AIAKYGVTHFCAAPVVLNTIVNASPEDT  
ILPLPHVVNVMTAGAAPPSVLF SMSQKGF RVTH  
TYGLSETYGPSTVCAWKPEWNSLPPETQARLNSR  
QGVRYIGLEFLDVIDTRTKKPPVPADGKTIGEIVLG

GNSVMKGYLKNPKANEEAFADGWFHSGDLGVKH  
PDNYIEIKDRSKDIIISGGENISSLEVENLLYLHP  
AILEASVVARPDERWGESPCAFITLKQGADKDEP  
RLAEDIMKFCREKMPAYWVPKSVIFGPLPKTATG  
KIQKHILRAKAKEMGPVKRSKL \*

TS-19

MEVQAKPQEELIIRSKLPDIYIPNHLPLHSYCFE  
NIAQVASRPLCLINGSTGDVYTYSDVELTARKIAS  
GLNKLGIQQYDVIMLLLPNFPEFILSFLGASYRGA  
IVTAANPLCTPAEISKQAEASNAKLIITQACYVDK  
VKALSEKRDKIMCIDAAPDGC LHFSELTQADEN  
DLPEVKFNPDDVVALPYSSGTTGLPKGVMLTHKG  
LVT SVAQQVDGENPNLYFHSEDVILCVLPLFIY  
ALNSIFLCGLRAGASILLMQRFEINSLQLIQRYK  
VTVAPMVPPIVLAIKSPDVKHDMSSIRFIKSGA  
APLGKELEDSVRAKFPNATLGQGYGMTEAGPVL  
MGLAFAKHPFPKPGACGTVVRNAEMKIIDPDTG  
AYLPRNQPGEICIRGDQIMKGYLNDQEATKRTID  
SDGWLHT

GDIGYIDDDDELFIVDRLKELIKYKGFQVAPAE  
EAMLLTHSSISDAAVVPMKDDQAGEVPVAFVKA  
KDSQITEDEVKQFISKQVVIFYKRINRVFFIDAIPK  
APSGKILRKDLRAKLAAGLPN \*

TS-20

MEGTIRCANYVPLSPISFLERSAIVYRDRLSVVY  
EDVKYTWKETHQRCIKLASALADLGISRGDVVAA  
LAPNIPAMYELHFGVPMAGAVLCTLNVRHDSAM  
VAVLLKHSEAKIIFVDHQLLDTARA AVEILAKSTT  
KLPLLVIIEPCSTVRNPIPAHENLEYESLLAKGIL  
DFEVRRPKDEWDPI SLNYTSGTTSSPKGVIYSHR  
GAYLNSLAVALLNEMSSMPTYLWCVP MFHCNGW  
CLTWAVAAQGGTNVCLRIVNAKGIFDNVARYKV  
THLGGAPT VLNMI VNAAGERRPLPGKVVM TG  
GAPPPPQVLF S MEELGFVVTHSYGLTETYGPGTV  
CTWKPEWDSLPREAQA KIKARQGLHHLGMEEVD  
IKDPVTMKSVP PDAKTMGEAMFRGNTVMNGYLK  
NSKATQDAFNGGWYR

SGDLGVKHPDGYIELKDRSKDIIISGGENISTIEV  
ESVLF SHPSVLEAAVVGRPDDHWGETPCAFVKLK  
DGC DASSEELIKYCRSRLPHFMAPRTIVFQDLPK  
TSTGKTQKFVLR EKAKAMGSISKQRSSKL \*

TS-21

MEGTIRCANYVPLSPISFLERSAIVYRDRLSVVY  
EDVKYTWKETHQRCIKLASALADLGISRGDVVAA

L A P N I P A M Y E L H F G V P M A G A V L C T L N V R H D S A M  
V A V L L K H S E A K I I F V D H Q L L D T A R A A V E I L A K S T T  
K L P L L V I I P E C S T V R N P I P A H E N L E Y E S L L A K G I L  
D F E V R R P K D E W D P I S L N Y T S G T T S S P K G V I Y S H R  
G A Y L N S L A V A L L N E M S S M P T Y L W C V P M F H C N G W  
C L T W A V A A Q G G T N V C L R I V N A K G I F D N V A R Y K V  
T H L G G A P T V L N M I V N A A A G E R R P L P G K V V V M T G  
G A P P P P Q V L F S M E E L G F V V T H S Y G L T E T Y G P G T V  
C T W K P E W D S L P R E A Q A K I K A R Q G L H H L G M E E V D  
I K D P V T M K S V P P D A K T M G E A M F R G N T V M N G Y L K  
N S K A T Q D A F N G G W Y R

S G D L G V K H P D G Y I E L K D R S K D I I S G G E N I S T I E V  
E S V L F S H P S V L E A A V V G R P D D H W G E T P C A F V K L K  
D G C D A S S E E L I K Y C R S R L P H F M A P R T I V F Q D L P K  
T S T G K T Q K F V L R E K A K A M G S I S K Q R S S K L \*

TS-22

M E Q R S L H T D P K S G F N S L T K T F H S L K A P V H L P P E N  
A F L S A A E Y A F S L R A T S P W P D D S V A L V N S I T G Q R I S  
Y S E F G H R T K S L A A Y L Q K V T Q L S K H D V A F V L S P N S  
I Q V P I L Y F S L L S L G V I I S P A N P V A T E S E I Y G Q I Q L S  
K P V I A F A R S S T V H K L P K L K H Q T I L I D S P E F E S M M V  
S S K H E F K H V K L S Q S D P A A I M Y S S G T T G K V K G V M L  
T H R N F I A Q T A I N S A A W K M S E K R E S P S A M L F T T P Y  
F H I F G F F Y S I R S V A L S E K A V V M D R F D W K N M L K A V  
Q E F S V T H V A L T P P V V V K L S K D G S T D D Y D L S S L E T  
V I C G A A P L G K E A I A A F T S R F P K V M L V Q A Y G L T E S  
T A A V A R T I G L E E N M K W G S T G K L Y A G F E A K V V D P  
E T S D A L P P C K E G E L W I R G P T I M K G Y V G D P E A T S A  
T L V C D G W M R

T G D L C Y I D E N G F L F I V D R L K E L I K Y K G Y Q V A P A E  
L E Q V L I S H P Q V A D A A V I P Y P D K E T G Q V P M A F V V R  
Q P Q S T L N E T E I M D F V A K Q V A P Y K K I R R V A F I N S I P  
K S A A G K I L R K D L I R K F V L P P P A S S R L \*
